# Supplementary material for: Experimental study of extracorporeal shock wave therapy for periprosthetic osteolysis induced by wear particles
Source: Research Square preprint supplement (doi:10.21203/rs.3.rs-5342963/v1), 2024-11-15
Supplement: Supplementary file 1 [file 4809126efd03f2e2559df7f3.xlsx]

## Sheet: Sheet1
Experimental equipment
Name of experimental instruments and consumables	manufacturer
The extracorporeal shock-wave therapy apparatus	Xiangyu Medical,China
automatic tissue dehydration apparatus	Junjie,China
Paraffin embedding machine	Junjie,China
Biological tissue stall chip baking machine	Junjie,China
Paraffin slicing machine	Leica Biosystems,China
Electric heating constant temperature blast drying box	Leibo Terry,China
microscope	Nikon,Japan
Microscope camera system	Nikon,Japan
Small animal live imaging system	KUBTEC,USA
superclean bench	Thermofisher Scientific, USA
refrigerated centrifuge	Thermofisher Scientific, USA
enzyme-labeled instrument	Bio-Rad,China
Ultra fine titanium particles	Jinchun Metal,China
0.9% saline	SJZ No.4 Pharmaceutical,China
pentobarbital sodium	Sanjing Pharmaceutical,China
carprofen	Aladdin,China
Dimethylsulfoxide (DMSO)	Solaibao,China
polyethylene glycol 300(PEG300)	Solaibao,China
Tween 80	Solaibao,China
Sodium penicillin for injection	North China Pharmaceutical,China
phosphate buffer	Solaibao,China
absolute ethyl alcohol	Xilong Scientific,China
dimethylbenzene	Xilong Scientific,China
4% paraformaldehyde	Solaibao,China
EDTA decalcifying Fluid	Solaibao,China
Hematoxylin	Solaibao,China
Eosin Y water soluble	Xiya Reagent,China
The TRAP staining kit	Sevierbio,China
Rat IL -1β ELISA Kit	Lianke Biotech,China
